# Supplementary material
Source: MDPI journal article supplement (https://www.mdpi.com/2073-4433/12/8/1060)
Supplement: s1 [file s1]

## Supplementary Materials:

Karyn Morrissey <sup>1,\*</sup>, Ivy Chung <sup>2</sup>, Andrew Morse <sup>3</sup>, Suhanya Parthasarath <sup>4</sup>, Margaret M. Roebuck <sup>5</sup>, Maw Pin Tan <sup>6</sup>, Amanda Wood <sup>4</sup>, Pooi-fong Wong <sup>2</sup> and Simon P. Frostick <sup>7,†</sup>

**Table S1.** Model Percentage change (with 95% confidence interval) in admissions for chronic respiratory disease associated with a 10  $\mu\text{g}/\text{m}^3$  increases in API (rounding to 2 decimal places) over 10 days.

| Lag/Day           | Relative Risk | 95% Lower CI | 95% Upper CI |
|-------------------|---------------|--------------|--------------|
| Lag 0             | 1.04          | 0.99         | 1.08         |
| Lag 1             | 0.99          | 0.97         | 1.01         |
| Lag 2             | 0.97          | 0.95         | 1            |
| Lag 3             | 0.97          | 0.95         | 0.99         |
| Lag 4             | 0.98          | 0.96         | 1            |
| Lag 5             | 1             | 0.98         | 1.01         |
| Lag 6             | 1.01          | 0.99         | 1.03         |
| Lag 7             | 1.02          | 1            | 1.04         |
| Lag 8             | 1.02          | 1            | 1.04         |
| Lag 9             | 1             | 0.99         | 1.02         |
| Cumulative effect | 0.97          | 0.876        | 1.078        |
